# Supplementary material for: Heterozygosity at a conserved candidate sex determination locus is associated with female development in the clonal raider ant (Ooceraea biroi)
Source: bioRxiv preprint, doi:10.1101/2025.01.24.634795, version 3 (2025-06-10)
Supplement: File S4 [file 634795_file05.xlsx]

## Sheet: Gene_Biotypes
Gene_type	RU	RefSeq	GenBank
guide_RNA	0	1	0
lncRNA	1767	1430	0
miRNA	239	0	0
misc_RNA	0	44	0
piRNA	23596	0	0
protein_coding	12839	11927	13022
pseudogene	0	373	77
rRNA	108	109	0
snoRNA	15	16	0
snRNA	22	26	0
tRNA	194	202	0

## Sheet: Transcript_Biotypes
	RU	RefSeq	GenBank
lncRNA	3795	1751	0
miRNA	239	0	0
mRNA	63620	24215	13099
piRNA	23596	0	0
rRNA	108	109	0
snoRNA	15	16	0
snRNA	22	26	0
tRNA	194	202	0
guide_RNA	0	1	0
transcript	0	818	0

## Sheet: gene_types
Gene_type	N_Of_genes
protein_coding	12839
lncRNA	1767
piRNA	23596
miRNA	239
snRNA	22
rRNA	108
tRNA	194
snoRNA	15

## Sheet: transcript_types
Transcript_type	N_Of_transcripts
lncRNA	3795
miRNA	239
mRNA	63620
piRNA	23596
rRNA	108
snoRNA	15
snRNA	22
tRNA	194

## Sheet: gffcompare_Summary_numbers
rowname	RU	RefSeq	GenBank
genes	36450	13457	13098
trascripts	91589	27135	13099
multi-exon_transcripts	65882	25945	11923

## Sheet: gffcompare_NovelAndMissing
rowname	n_of_against_RefSeq	Total_against_RefSeq	n_of_against_Genbank	Total_against_Genbank
Missed_exons	1039	104287	3853	78386
Novel_exons	36536	182100	69844	182100
Missed_introns	979	86099	2808	65288
Novel_introns	8059	100540	24978	100540
Missed_loci	75	13457	1003	13098
Novel_loci	23107	36450	25163	36450

## Sheet: gffcompare_matching
rowname	RefSeq	GenBank
Matching_loci	11678	5437
Matching_transcripts	23441	5438
Matching_intron_chains	23441	5438

## Sheet: gffcompare_sensitivity
level	RefSeq_Sensitivity	GenBank_Sensitivity
Base_level	97.4	94.4
Exon_level	95.8	68.2
Intron_chain_level	90.3	45.6
Intron_level	97.2	89.3
Locus_level	86.8	41.5
Transcript_level	86.4	41.5

## Sheet: gffcompare_precision
level	RefSeq_Precision	GenBank_Precision
Base_level	48.2	21.7
Exon_level	61.8	30.2
Intron_chain_level	35.6	8.3
Intron_level	83.2	58.0
Locus_level	31.8	14.8
Transcript_level	25.6	5.9

## Sheet: squanti_transcript_categories
structural_category	RU_vs_RefSeq	RU_vs_Genbank
antisense	994	1736
full-splice_match	36932	9829
fusion	1719	5086
genic	332	1459
genic_intron	0	1
incomplete-splice_match	3720	1595
intergenic	2062	5103
novel_in_catalog	9640	3315
novel_not_in_catalog	12594	39869

[truncated: 4 more sheets: squanti_subtranscript_categor, squanti_coding_categories, squanti_junction_categories, busco_results]
